# Supplementary material for: Neutralizing antibody responses over time in demographically and clinically diverse individuals recovered from SARS-CoV-2 infection in the United States and Peru: A cohort study
Source: PubMed Central journal article supplement (PMC8687542; doi:10.1371/journal.pmed.1003868), 2021-12-06
Supplement: pmed.1003868.s005.pdf [file pmed.1003868.s005.pdf]

## S2 Data. Supplemental figures A-G.

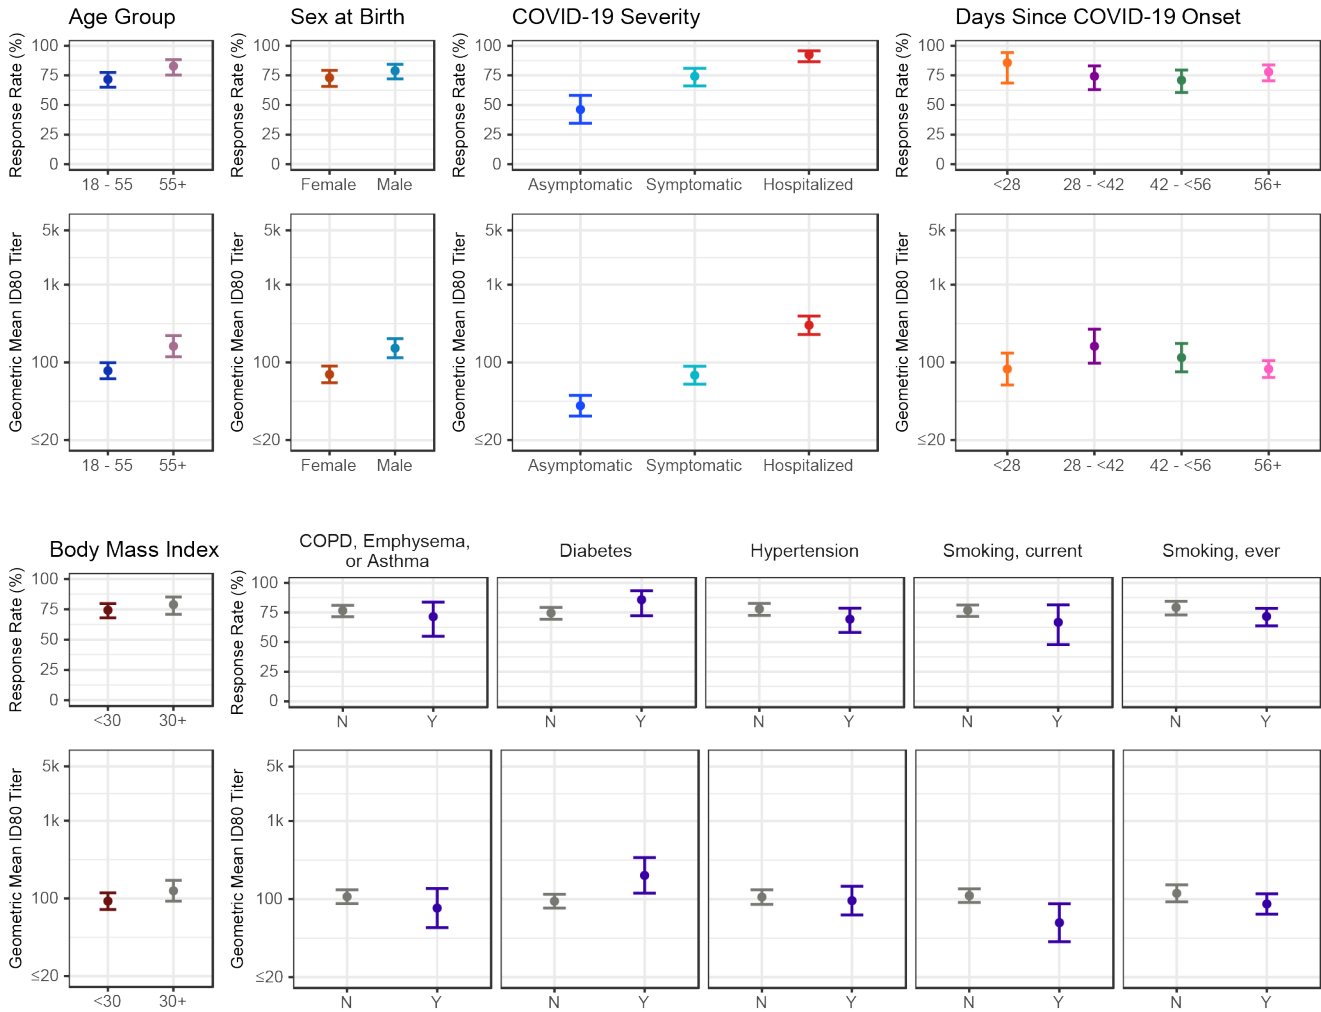

**Figure A. Geometric mean titer (GMT) ID80 at enrollment visit and 95% CI by enrollment group, severity, medical history, and days since COVID-19 onset in Americas.**

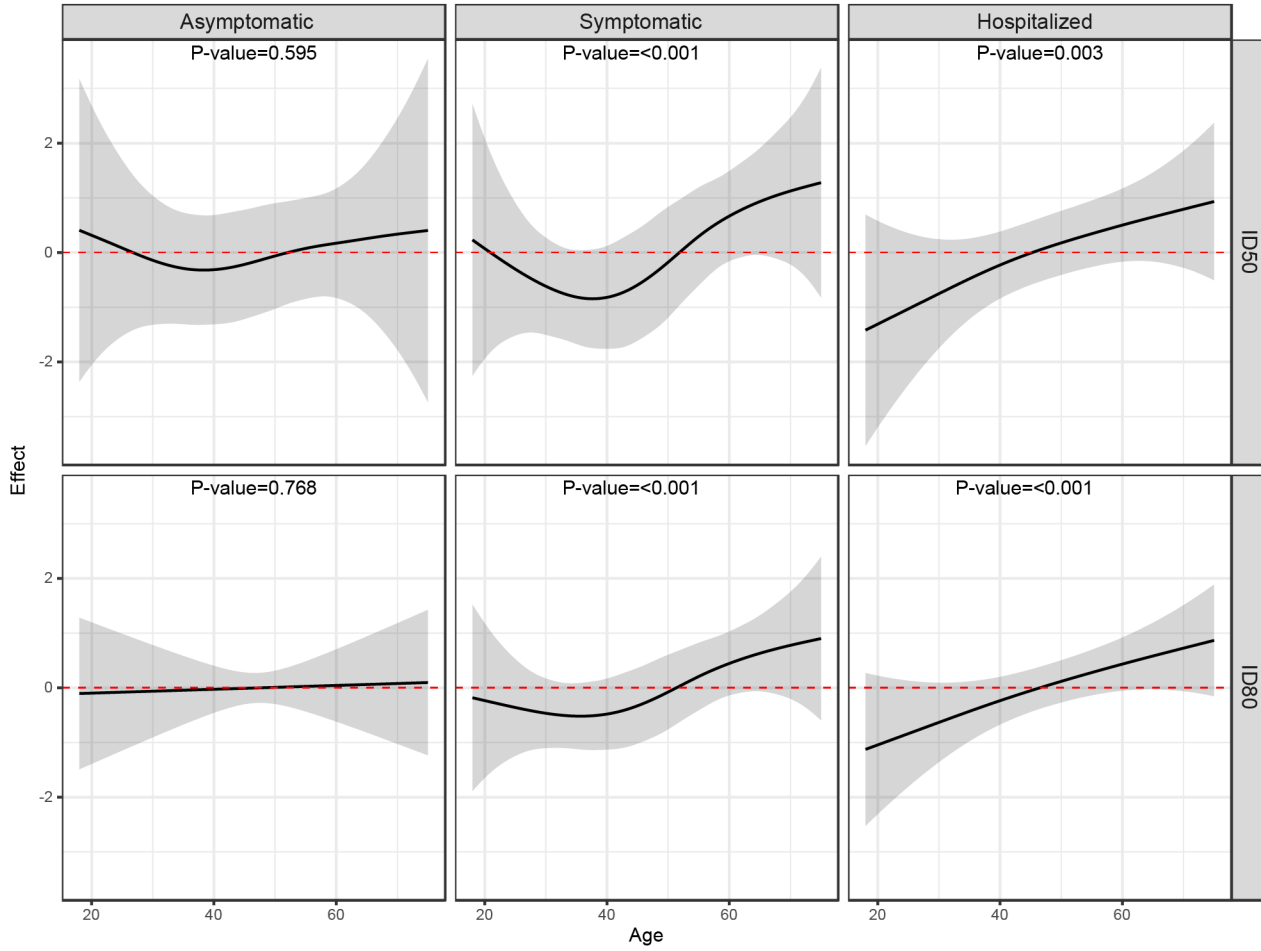

**Figure B. Estimated age effect on nAb log-titers stratifying by COVID-19 severity adjusting for COVID-19 severity, medical history, other demographics, and days since SARS-CoV-2 diagnosis using generalized additive model.**

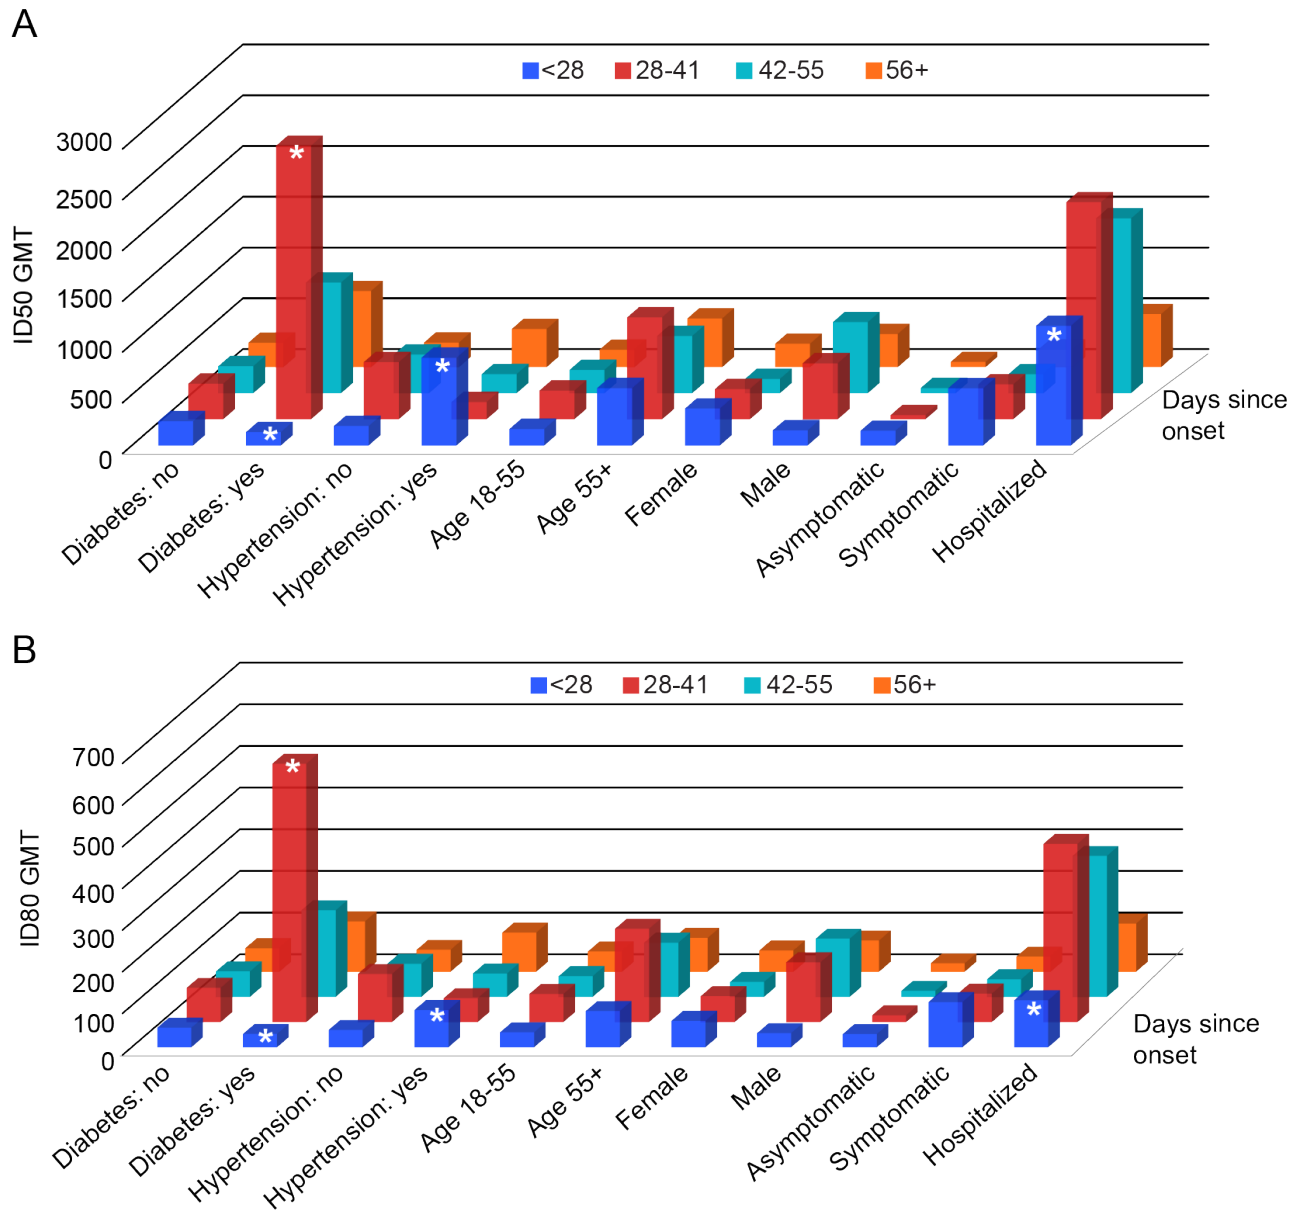

**Figure C. Geometric mean titer (GMT) of nAb ID50 (A) and ID80 (B) titer at the enrollment visit in Americas. White asterisks denote groups with fewer than 10 participants.**

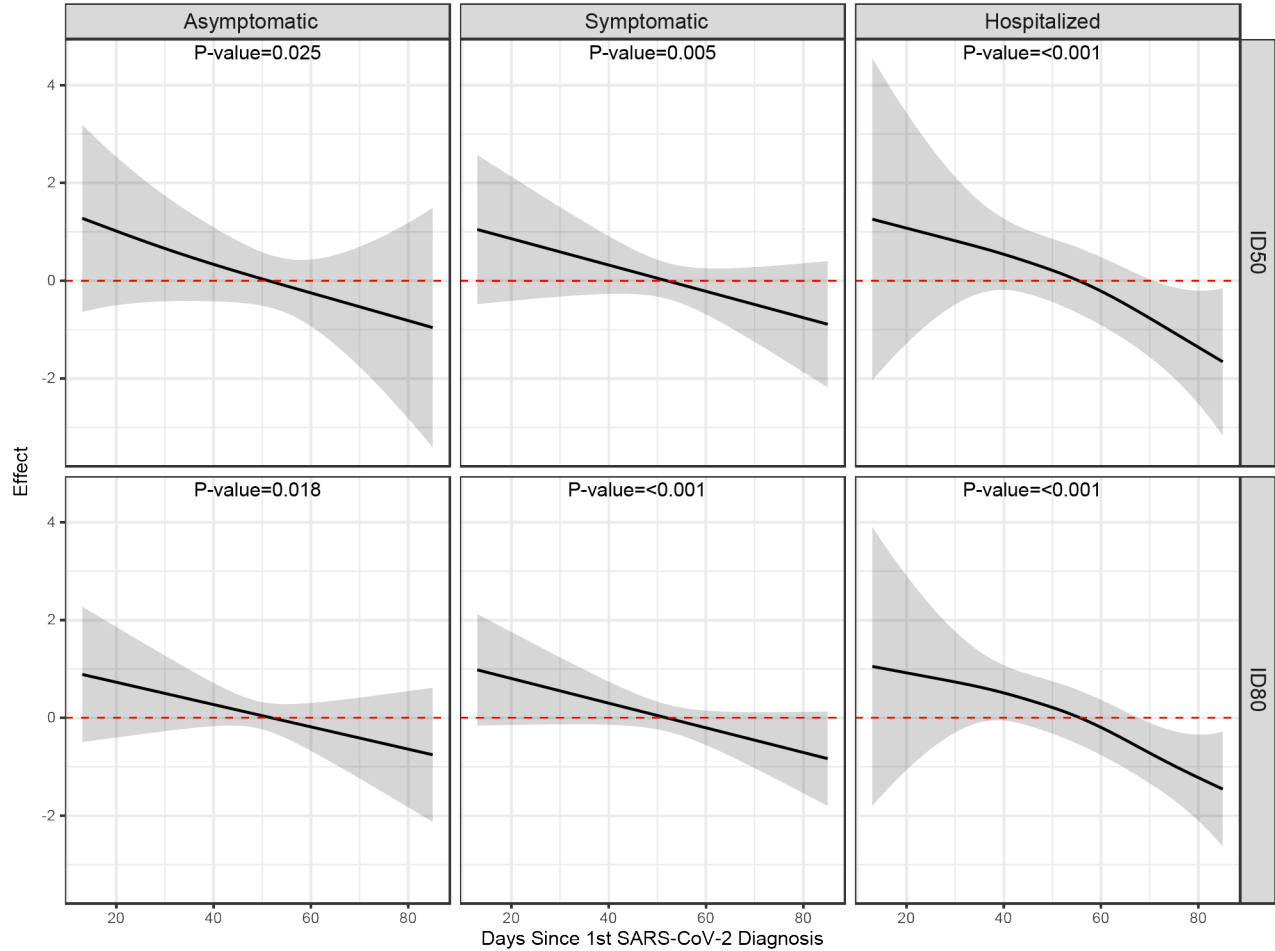

**Figure D. Estimated days since SARS-CoV-2 diagnosis (days) effect on nAb log-titers stratifying by COVID-19 severity adjusting for COVID-19 severity, medical history, and demographics using generalized additive model.**

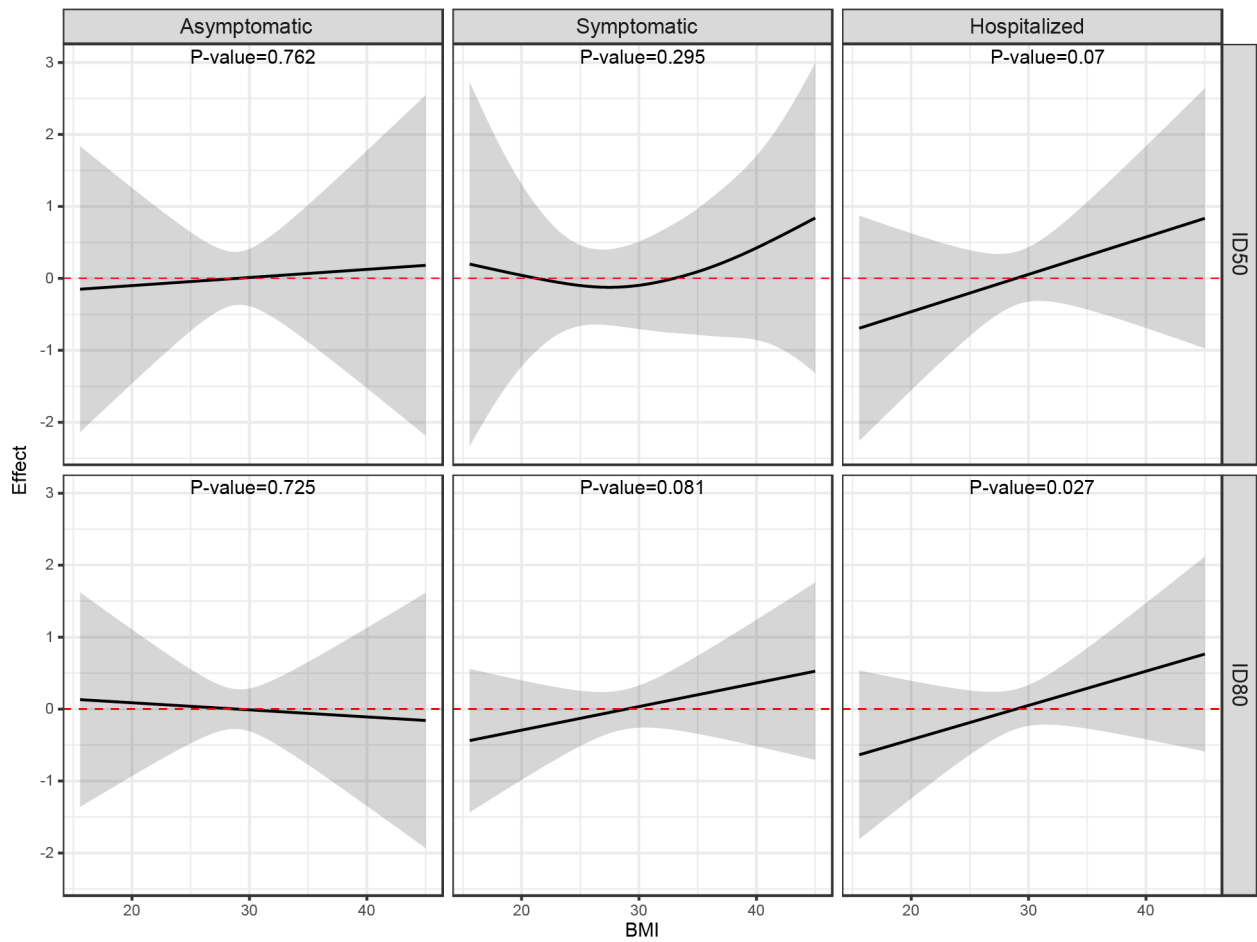

**Figure E. Estimated BMI effect on nAb log-titers stratifying by COVID-19 severity adjusting for COVID-19 severity, medical history, other demographics, and days since SARS-CoV-2 diagnosis using generalized additive model.**

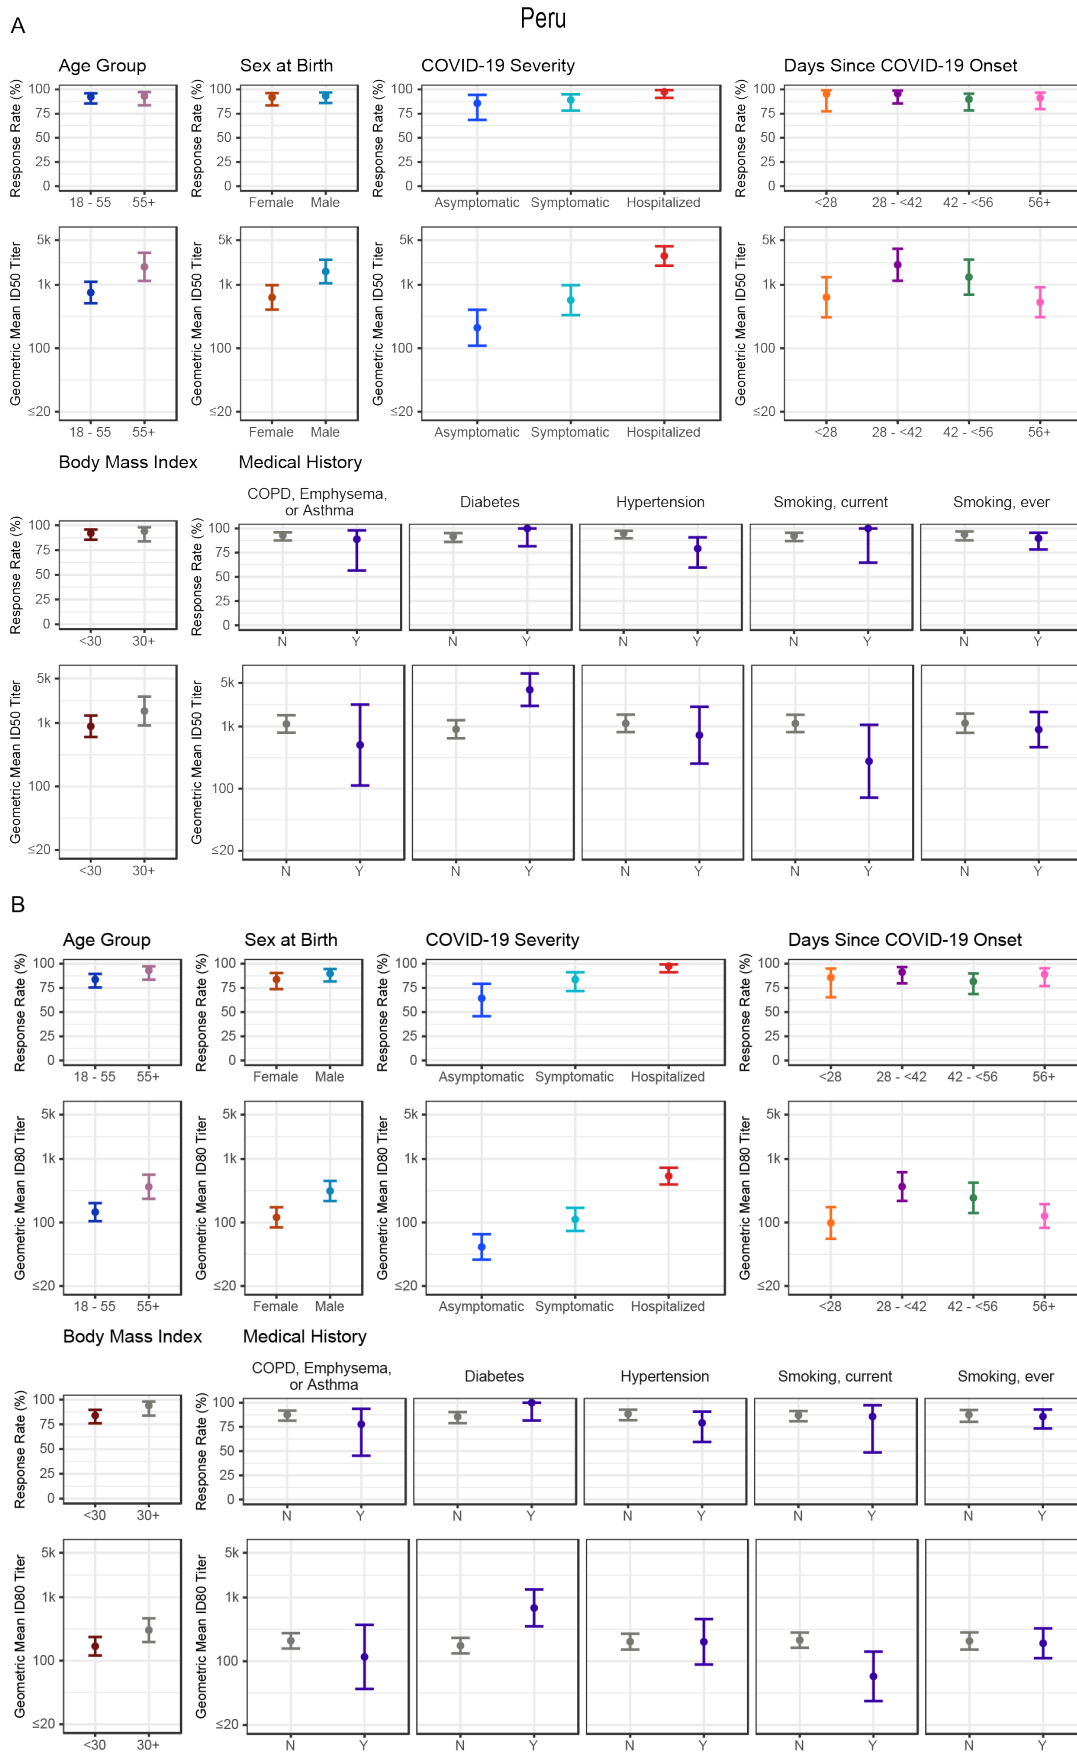

**Figure F. Geometric mean titer (GMT) at enrollment visit and 95% CI by enrollment group, severity, medical history, and days since SARS-CoV-2 diagnosis in USA and Peru. A. Peru, ID50. B. Peru, ID80. C. US, ID50. D. US, ID80.**

# US

C

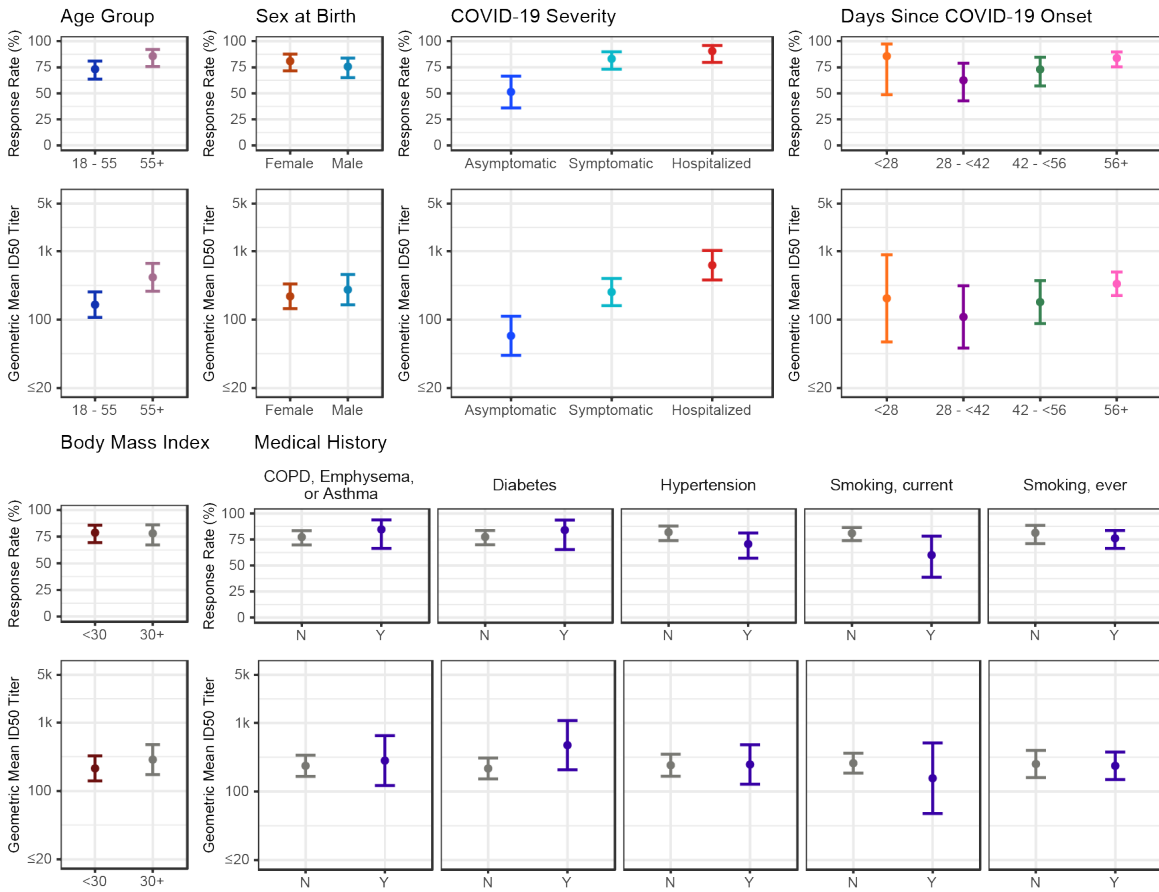

D

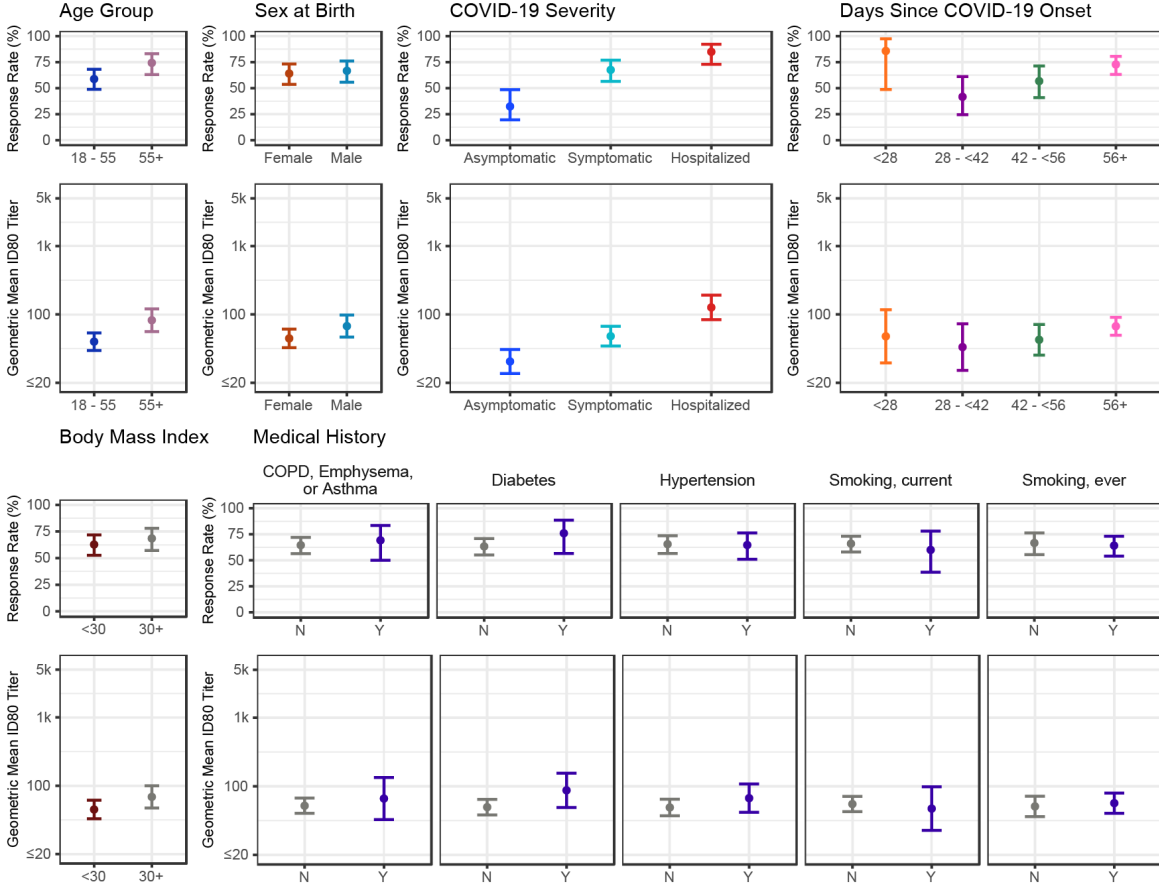

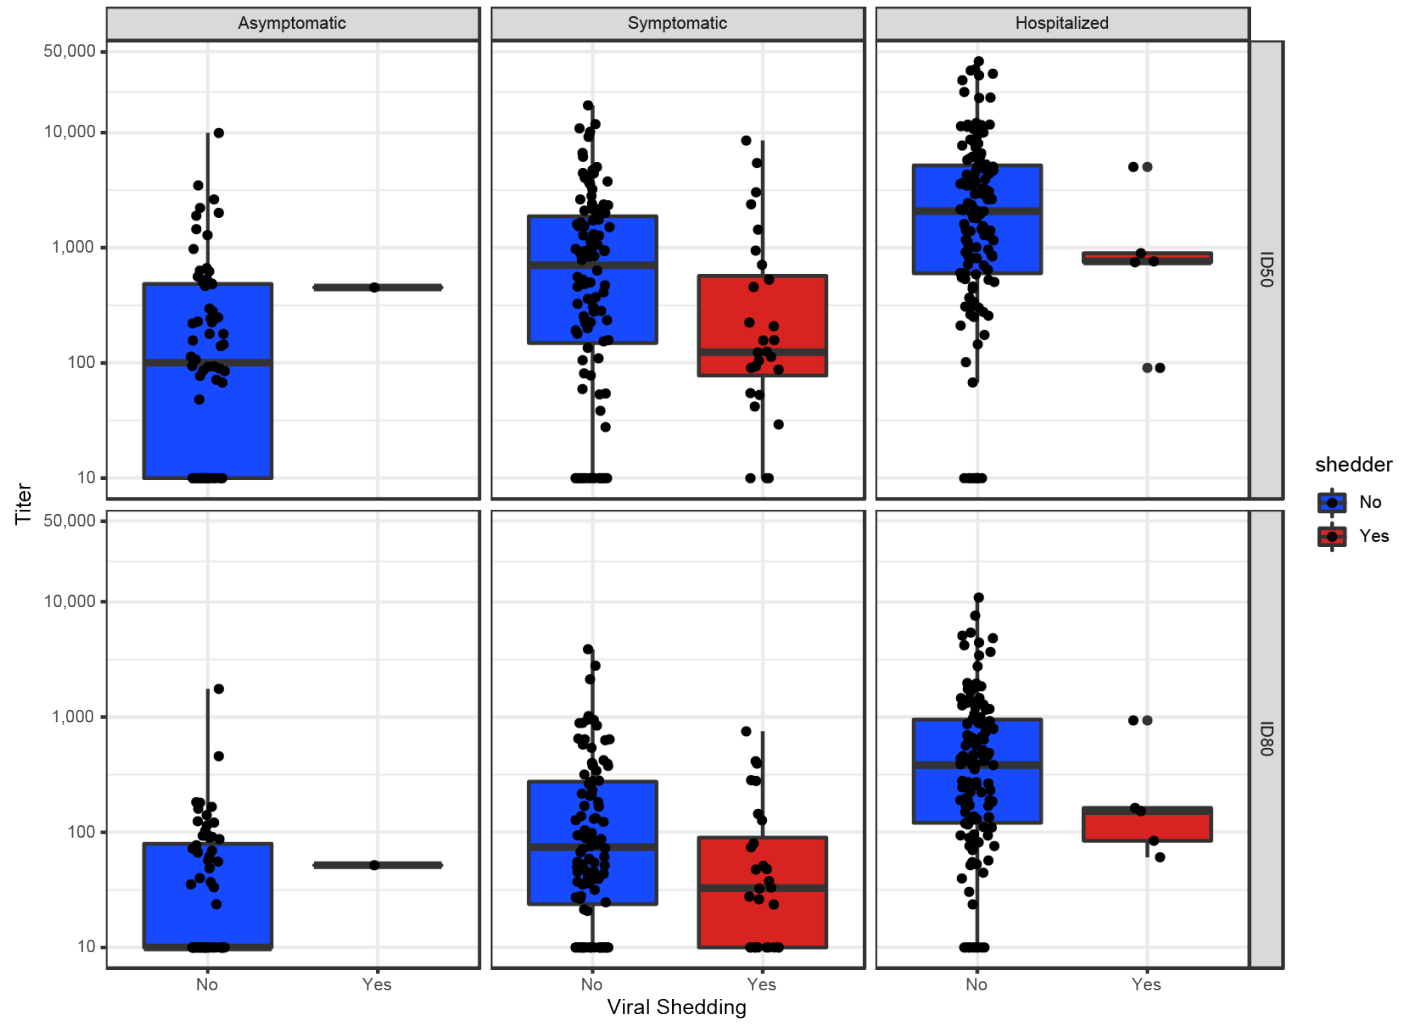

Figure G. NAb titers by prolonged viral shedding status and COVID-19 severity.
